# Supplementary material
Source: PubMed Central journal article supplement (PMC4160829)
Supplement: NIHMS623481-supplement-Supplementary_Materials.pdf [file NIHMS623481-supplement-Supplementary_Materials.pdf]

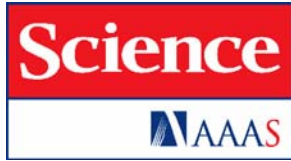

## Supporting Online Material for

### **Seroevidence for H5N1 Influenza Infections in Humans: Meta-Analysis**

Taia T. Wang, Michael K. Parides, Peter Palese\*

\*To whom correspondence should be addressed. E-mail: peter.palese@mssm.edu

Published 23 February 2012 on *Science Express*  
DOI: 10.1126/science.1218888

#### **This PDF file includes:**

Materials and Methods  
Tables S1 and S2  
References

## Supplementary Online Materials

**Table S1. WHO Criteria for Confirmation of H5N1 Infection in Humans (3).**

|                                                                                                                                                                              |                                                                                                                                  |                                                                                                                                                                                                                                                                                                                                                                                                                                                                                                                            |
|------------------------------------------------------------------------------------------------------------------------------------------------------------------------------|----------------------------------------------------------------------------------------------------------------------------------|----------------------------------------------------------------------------------------------------------------------------------------------------------------------------------------------------------------------------------------------------------------------------------------------------------------------------------------------------------------------------------------------------------------------------------------------------------------------------------------------------------------------------|
| <p><b>Suspected H5N1 infection</b><br/>Body temperature &gt; 38°C (100.3° F) with acute lower respiratory illness and dyspnea.</p>                                           | <p><b>AND</b> ≥ 1 of the following within the 7 days preceding symptom onset:</p>                                                | <p><b>A)</b> Close contact with person who likely has H5N1 infection.<br/><b>B)</b> Exposure to live or dead birds or bird feces in area with likely H5N1 circulation.<br/><b>C)</b> Consumption of raw/undercooked poultry in area with likely H5N1 circulation.<br/><b>D)</b> Close contact with non-bird animal with confirmed H5N1 infection.<br/><b>E)</b> Handling samples suspected of containing H5N1 virus.</p>                                                                                                   |
| <p><b>Probable H5N1 infection (Definition 1)</b><br/>Person meets criteria for suspected case.</p>                                                                           | <p><b>AND</b> 1 of the following additional criteria:</p>                                                                        | <p><b>A)</b> Infiltrates or evidence of acute pneumonia on chest x-ray with evidence of respiratory failure (hypoxemia, severe tachypnea).<br/><b>B)</b> Lab confirmation of influenza A infection without specific evidence of H5N1 infection.</p>                                                                                                                                                                                                                                                                        |
| <p><b>Probable H5N1 infection (Definition 2)</b><br/>Person dying of an unexplained acute respiratory illness who has been exposed to a probable or confirmed H5N1 case.</p> |                                                                                                                                  |                                                                                                                                                                                                                                                                                                                                                                                                                                                                                                                            |
| <p><b>Confirmed H5N1</b><br/>Person meets criteria for suspected or probable case.</p>                                                                                       | <p><b>AND</b> 1 of following positive results conducted in influenza laboratory whose H5N1 test results are accepted by WHO:</p> | <p><b>A)</b> Isolation of H5N1 virus.<br/><b>B)</b> H5N1 PCR amplification of 2 different virus targets (ex: HA and NA genes).<br/><b>C)</b> ≥ 4-fold rise in neutralizing antibody titer for H5N1 based on paired-serum samples (one acute, one convalescent specimen). Convalescent neutralizing titer must be ≥ 1:80.<br/><b>D)</b> Microneutralization titer for H5N1 ≥ 1:80 in a single serum sample collected ≥ 14 days post symptom onset with positive result using a separate serological assay (ex: HI, WB).</p> |

HA: Hemagglutinin, NA: Neuraminidase, HI: Hemagglutination Inhibition, WB: Western Blot

**Table S2. Compiled Data Describing Seroprevalence of H5N1 virus infection.**

| STUDY POPULATION    | WHERE/WHEN       | POSITIVE (%)                     | CRITERIA USED | INCLUDED IN PRIMARY ANALYSIS? | REF  |
|---------------------|------------------|----------------------------------|---------------|-------------------------------|------|
| 217 Exp HCWs ♦      | Hong Kong/1997   | 8/217 (3.7%)                     | WHO           | YES                           | (7)  |
| 309 Unexp HCWs ♦    | Hong Kong/1997   | 2/309 (0.7%)                     | WHO           | YES                           | (7)  |
| 51 House contacts ♦ | Hong Kong/1997   | 6/51 (11.7%)                     | WHO           | YES                           | (5)  |
| 73 Mixed exp ♦      | Hong Kong/1997   | 1/73 (1.3%)                      | WHO           | YES                           | (5)  |
| 1525 Poultry wks ♦  | Hong Kong/1997-8 | 81/1525 (5.3%)**                 | WHO           | YES                           | (4)  |
| 293 Gov wks ♦       | Hong Kong/1997-8 | 9/293 (3%)                       | WHO           | YES                           | (4)  |
| 231 Poultry wks     | China/2004       | 7/231 (3.0%)                     | OTHER         | NO                            | (15) |
| 983 Mixed exp       | China/2004       | 23/983 (2.34%)                   | OTHER         | NO                            | (15) |
| 322 Poultry wks ♦♦  | Thailand/2004    | 0/322                            | WHO           | YES                           | (20) |
| 25 Exp HCWs ♦       | Thailand/2004    | 0/25                             | WHO           | YES                           | (23) |
| 24 Unexp HCWs ♦     | Thailand/2004    | 0/24                             | WHO           | YES                           | (23) |
| 351 Mixed exp       | Cambodia/2005    | 0/351                            | WHO           | YES                           | (24) |
| 500 Poultry wks     | Vietnam/2005     | 1/500 (0.2%) / 3/500 (0.6%)      | WHO/OTHER     | YES*                          | (17) |
| 901 Mixed exp       | Thailand/2005    | 0/901 / 13/901 (1.4%)            | WHO/OTHER     | YES*                          | (13) |
| 841 Mixed exp       | Indonesia/2005   | 0/841                            | WHO           | YES                           | (22) |
| 87 Poultry wks      | Indonesia/2005   | 0/87                             | WHO           | YES                           | (22) |
| 295 Poultry wks ♦♦♦ | Nigeria/2006     | 0/295                            | WHO           | YES                           | (21) |
| 25 Lab wks ♦♦♦      | Nigeria/2006     | 0/25                             | WHO           | YES                           | (21) |
| 674 Mixed exp       | Cambodia/2006    | 7/674 (1%)                       | WHO           | YES                           | (25) |
| 376 Mixed exp       | Turkey/2006      | 27/376 (7.1%)                    | OTHER         | NO                            | (12) |
| 91 Mixed exp        | China/2007       | 0/91                             | WHO           | YES                           | (26) |
| 495 Poultry wks φ   | Indonesia/2007   | 0/495                            | OTHER         | NO                            | (16) |
| 700 Mixed exp       | Cambodia/2007    | 18/700 (2.6%)                    | WHO           | YES                           | (8)  |
| 97 Mixed exp φ      | Germany/2007     | 0/97                             | OTHER         | NO                            | (11) |
| 2191 Mixed exp      | China/2007-08    | 4/2191 (0.2%)                    | OTHER         | NO                            | (18) |
| 800 Mixed exp       | Thailand/2008    | 45/800 (5.6) or*** 28/800 (3.5%) | OTHER         | NO                            | (14) |
| 200 Blood donors φ  | China/2009       | 0/200                            | OTHER         | NO                            | (19) |

Exp: Exposed, Unexp: Unexposed, HCWs: Health care workers, Wks: workers, Gov: government

Mixed exposure populations: Persons living in an area where H5N1 infections were confirmed in animals or humans or persons with possible exposure to H5N1 for reasons other than location of residence (possible exposure during work activities, travel, etc).

WHO criteria: see methods. OTHER criteria: other than that used by WHO (ex: Titer  $\geq 1:20$  or  $\geq 1:40$  or  $\geq 1:160$  was considered a positive result), using a commercial kit or the authors did not specify the criteria that was used.

\* Only samples confirmed using WHO criteria were counted in the primary analysis. \*\* The authors tested only 52% of their samples that were positive in an initial assay using a second assay. In accordance with WHO criteria, we have only counted the samples that were tested and scored positive in two independent assays. \*\*\* It was unclear from this report whether the 5.6% and 3.5% overlapped at all - in our analysis, we assumed that all positive samples overlapped and used 45/800 as the overall rate of seropositivity. φ Adult subjects specified. ♦Persons  $\leq 18$  and/or  $\geq 60$  years specifically excluded from analysis. ♦♦Persons  $\geq 50$  years excluded from analysis. ♦♦♦ Persons  $\leq 12$  or  $\geq 60$  years excluded from analysis.

## Materials and Methods

**Case definition:** A confirmed case of H5N1 infection under WHO guidelines is defined (at a minimum) as a person who is documented to have an acute febrile illness with respiratory symptoms, have a known exposure to H5N1 virus during the 7 days preceding presentation, and have laboratory-based molecular confirmation of H5 virus infection (SOM Table 1) (3).

Where any ambiguity existed for the primary meta-analysis (using WHO criteria, see methods), we were conservative in our interpretation of data so as not to overestimate seroprevalence. This applies, for example, to one of the largest studies of 1,525 poultry workers by Bridges *et al.* (4), in which only 52% of samples positive in a primary screen were examined by a secondary screen; the authors extrapolate, from the rate of secondary screen confirmation, an overall positive rate of 10% within their sample population. To meet WHO criteria, we only scored as positive samples that were confirmed in two different assays, resulting in an artificially low seroprevalence.

Of note, many of the studies in this analysis exclude persons over the age of 60 and/or under the age of 18, while the majority of confirmed H5N1 infections have occurred in people under the age of 18 (SOM Table 2) (27). Furthermore, there is a relatively narrow window of detection for prior H5N1 infection by serology, because peak titers are found during weeks 4 - 6 post infection and a reduction by 4 - 32-fold in H5N1

neutralizing antibody titer is observed by 10-11 months post infection (6). Maximum sensitivity for detection of H5N1 serum antibody can be achieved by using a microneutralization assay with confirmation by Western blot to a sensitivity of 80% and specificity of 96% (28). This 80% sensitivity has been approximated from data describing seropositivity, using WHO criteria, in serum from persons with confirmed H5N1 infection (6, 12, 29). Together, these observations suggest that the true rate of H5N1 infection may be underestimated in this analysis.

The study population of this meta-analysis is highly heterogeneous. Data were obtained using non-standardized methods in different countries over a period of twelve years. It is also likely that distinct H5N1 virus strains were circulating in different study populations, with some strains infecting humans more efficiently than others. We have attempted to standardize the interpretation of the combined data by using the WHO criteria for H5N1 seropositivity, where possible. The majority of study subjects lived in rural regions with documented human or avian H5N1 infections. While some study participants lived in urban areas, sufficient data from non-specific exposure groups did not exist in order to generate a meaningful sub-analysis of urban versus rural H5N1 seroprevalence.

## **Meta-analysis**

Meta-analysis was used to combine the individual estimates of seroprevalence from each study into an overall seroprevalence estimate. The meta-analysis employed a random effects approach as described by DerSimonian and Laird (9), to account for the clear variability present between the individual study estimates. Two meta-analyses were performed, one using the modified WHO criteria for seropositivity, and the other using the criteria reported by each respective author. Forest plots summarize the results from each study, and overall, in terms of estimated seroprevalence with associated 95% confidence intervals (30). The confidence intervals for individual studies are based on the “exact” approach of Clopper and Pearson (31).

## **Data Evaluation**

Data in studies were evaluated by WHO criteria for serological diagnosis of human infection with H5N1 influenza virus. The WHO protocol for serological identification of antibodies against avian influenza A (H5N1) is either i) the detection of a 4-fold or greater increase in neutralizing antibody titer in paired acute and convalescent sera, with the convalescent serum having a titer of  $\geq 1:80$ , or ii) antibody titre of  $\geq 1:80$  in a single serum collected at day 14 or later after onset of symptoms and a positive result using a different serological assay (e.g., H5-specific Western blot, hemagglutination inhibition assay). To allow for the detection of asymptomatic infections, we modified the WHO criteria for this analysis by eliminating the requirement that study participants be symptomatic. Of note, these WHO criteria for identification of H5N1 antibodies are not

specific for the identification of viruses expressing a neuraminidase subtype 1 or for viruses expressing a hemagglutinin with a multi-basic cleavage site. However, it is more likely that human infection is due to highly pathogenic avian influenza viruses (with a multi-basic cleavage site) since they replicate to high titers in infected poultry.

### **Search Strategy and Inclusion/Exclusion Criteria**

We searched PubMed for articles published between 1999-2011 that describe antibody-based evaluation of human serum for evidence of H5N1 virus infection. Search terms included: human, influenza A, H5N1, seropositivity, seroprevalence, serology, subclinical, infections. Studies were included in the primary analysis if they clearly state methods that are interpretable by WHO criteria for serological diagnosis of human infection, the study population was >10 people, whether or not the participants had known exposure to H5N1-infected animals or humans, wore personal protective equipment during known exposure, or received prophylactic medications following known exposure. Studies/portions of studies were excluded if they describe patients with confirmed H5N1 infection or if they analyzed populations already taken into account in a separate study. These criteria eliminated some published reports (6, 32-37). After completion of the analysis, three papers came to our attention which had been excluded (38-40); seropositivity in these studies were 0/60 ((40), not WHO criteria) 0/83 ((38), not WHO criteria) and 1/110 ((39), WHO criteria).

## References and Notes

1. WHO, Cumulative number of confirmed human cases for avian influenza A(H5N1) reported to WHO, 2003-2011; [http://www.who.int/influenza/human\\_animal\\_interface/H5N1\\_cumulative\\_table\\_archives/en/index.html](http://www.who.int/influenza/human_animal_interface/H5N1_cumulative_table_archives/en/index.html). (2011).
2. A. N. Abdel-Ghafar *et al.*, Update on avian influenza A (H5N1) virus infection in humans. *N. Engl. J. Med.* **358**, 261 (2008). [doi:10.1056/NEJMra0707279](https://doi.org/10.1056/NEJMra0707279) [Medline](#)
3. WHO, WHO case definitions for human infections with influenza A(H5N1) virus. (2006).
4. C. B. Bridges *et al.*, Risk of influenza A (H5N1) infection among poultry workers, Hong Kong, 1997-1998. *J. Infect. Dis.* **185**, 1005 (2002). [doi:10.1086/340044](https://doi.org/10.1086/340044) [Medline](#)
5. J. M. Katz *et al.*, Antibody response in individuals infected with avian influenza A (H5N1) viruses and detection of anti-H5 antibody among household and social contacts. *J. Infect. Dis.* **180**, 1763 (1999). [doi:10.1086/315137](https://doi.org/10.1086/315137) [Medline](#)
6. P. Buchy *et al.*, Kinetics of neutralizing antibodies in patients naturally infected by H5N1 virus. *PLoS ONE* **5**, e10864 (2010). [doi:10.1371/journal.pone.0010864](https://doi.org/10.1371/journal.pone.0010864) [Medline](#)
7. C. Buxton Bridges *et al.*, Risk of influenza A (H5N1) infection among health care workers exposed to patients with influenza A (H5N1), Hong Kong. *J. Infect. Dis.* **181**, 344 (2000). [doi:10.1086/315213](https://doi.org/10.1086/315213) [Medline](#)
8. P. Cavailler *et al.*, Seroprevalence of anti-H5 antibody in rural Cambodia, 2007. *J. Clin. Virol.* **48**, 123 (2010). [doi:10.1016/j.jcv.2010.02.021](https://doi.org/10.1016/j.jcv.2010.02.021) [Medline](#)
9. R. DerSimonian, N. Laird, Meta-analysis in clinical trials. *Control. Clin. Trials* **7**, 177 (1986). [doi:10.1016/0197-2456\(86\)90046-2](https://doi.org/10.1016/0197-2456(86)90046-2) [Medline](#)
10. Materials and Methods in supplementary online-material.
11. W. Cai *et al.*, Protective measures and H5N1-seroprevalence among personnel tasked with bird collection during an outbreak of avian influenza A/H5N1 in wild birds, Rügen, Germany, 2006. *BMC Infect. Dis.* **9**, 170 (2009). [doi:10.1186/1471-2334-9-170](https://doi.org/10.1186/1471-2334-9-170) [Medline](#)
12. M. Ceyhan *et al.*, Serosurveillance study on transmission of H5N1 virus during a 2006 avian influenza epidemic. *Epidemiol. Infect.* **138**, 1274 (2010). [doi:10.1017/S095026880999166X](https://doi.org/10.1017/S095026880999166X) [Medline](#)
13. R. Dejpichai *et al.*, Seroprevalence of antibodies to avian influenza virus A (H5N1) among residents of villages with human cases, Thailand, 2005. *Emerg. Infect. Dis.* **15**, 756 (2009). [doi:10.3201/eid1505.080316](https://doi.org/10.3201/eid1505.080316) [Medline](#)
14. B. P. Khuntirat *et al.*, Evidence for subclinical avian influenza virus infections among rural Thai villagers. *Clin. Infect. Dis.* **53**, e107 (2011). [doi:10.1093/cid/cir525](https://doi.org/10.1093/cid/cir525) [Medline](#)
15. C. Y. Lu *et al.*, Potential infections of H5N1 and H9N2 avian influenza do exist in Guangdong populations of China. *Chin. Med. J. (Engl.)* **121**, 2050 (2008). [Medline](#)



16. M. Robert, R. B. Holle, V. Setiawaty, K. N. Pangesti, E. R. Sedyaningsih, Seroprevalence of avian influenza A/H5N1 among poultry farmers in rural Indonesia, 2007. *Southeast Asian J. Trop. Med. Public Health* **41**, 1095 (2010). [Medline](#)
17. C. Schultz *et al.*, Prevalence of antibodies against avian influenza A (H5N1) virus among Cullers and poultry workers in Ho Chi Minh City, 2005. *PLoS ONE* **4**, e7948 (2009). [doi:10.1371/journal.pone.0007948](https://doi.org/10.1371/journal.pone.0007948) [Medline](#)
18. M. Wang, C. X. Fu, B. J. Zheng, Antibodies against H5 and H9 avian influenza among poultry workers in China. *N. Engl. J. Med.* **360**, 2583 (2009). [doi:10.1056/NEJMc0900358](https://doi.org/10.1056/NEJMc0900358) [Medline](#)
19. R. Zhang, X. Rong, W. Pan, T. Peng, Determination of serum neutralization antibodies against seasonal influenza A strain H3N2 and the emerging strains 2009 H1N1 and avian H5N1. *Scand. J. Infect. Dis.* **43**, 216 (2011). [doi:10.3109/00365548.2010.539258](https://doi.org/10.3109/00365548.2010.539258) [Medline](#)
20. S. Hinjoy *et al.*, Low frequency of infection with avian influenza virus (H5N1) among poultry farmers, Thailand, 2004. *Emerg. Infect. Dis.* **14**, 499 (2008). [doi:10.3201/eid1403.070662](https://doi.org/10.3201/eid1403.070662) [Medline](#)
21. J. R. Ortiz *et al.*, Lack of evidence of avian-to-human transmission of avian influenza A (H5N1) virus among poultry workers, Kano, Nigeria, 2006. *J. Infect. Dis.* **196**, 1685 (2007). [doi:10.1086/522158](https://doi.org/10.1086/522158) [Medline](#)
22. K. Santhia *et al.*, Avian influenza A H5N1 infections in Bali Province, Indonesia: a behavioral, virological and seroepidemiological study. *Influenza Other Respir. Viruses* **3**, 81 (2009). [doi:10.1111/j.1750-2659.2009.00069.x](https://doi.org/10.1111/j.1750-2659.2009.00069.x) [Medline](#)
23. A. Apisarnthanarak *et al.*, Seroprevalence of anti-H5 antibody among Thai health care workers after exposure to avian influenza (H5N1) in a tertiary care center. *Clin. Infect. Dis.* **40**, e16 (2005). [doi:10.1086/427034](https://doi.org/10.1086/427034) [Medline](#)
24. S. Vong *et al.*, Low frequency of poultry-to-human H5N1 virus transmission, southern Cambodia, 2005. *Emerg. Infect. Dis.* **12**, 1542 (2006). [doi:10.3201/eid1210.060424](https://doi.org/10.3201/eid1210.060424) [Medline](#)
25. S. Vong *et al.*, Risk factors associated with subclinical human infection with avian influenza A (H5N1) virus—Cambodia, 2006. *J. Infect. Dis.* **199**, 1744 (2009). [doi:10.1086/599208](https://doi.org/10.1086/599208) [Medline](#)
26. H. Wang *et al.*, Probable limited person-to-person transmission of highly pathogenic avian influenza A (H5N1) virus in China. *Lancet* **371**, 1427 (2008). [doi:10.1016/S0140-6736\(08\)60493-6](https://doi.org/10.1016/S0140-6736(08)60493-6) [Medline](#)
27. J. H. Beigel *et al.*, Avian influenza A (H5N1) infection in humans. *N. Engl. J. Med.* **353**, 1374 (2005). [doi:10.1056/NEJMr052211](https://doi.org/10.1056/NEJMr052211) [Medline](#)
28. T. Rowe *et al.*, Detection of antibody to avian influenza A (H5N1) virus in human serum by using a combination of serologic assays. *J. Clin. Microbiol.* **37**, 937 (1999). [Medline](#)

29. R. Kitphati *et al.*, Kinetics and longevity of antibody response to influenza A H5N1 virus infection in humans. *Clin. Vaccine Immunol.* **16**, 978 (2009). [doi:10.1128/CVI.00062-09](https://doi.org/10.1128/CVI.00062-09) [Medline](#)
30. L. V. Hedges, I. Olkin, M. Statistiker, Statistical methods for meta-analysis. (Academic Press Orlando, FL, 1985).
31. C. Clopper, E. S. Pearson, The Use of Confidence or Fiducial Limits Illustrated in the Case of the Binomial. *Biometrika* **26**, 404 (1934). [doi:10.1093/biomet/26.4.404](https://doi.org/10.1093/biomet/26.4.404)
32. I. Belmaker *et al.*, Adherence with oseltamivir chemoprophylaxis among workers exposed to poultry during avian influenza outbreaks in southern Israel. *Int. J. Infect. Dis.* **13**, 261 (2009). [doi:10.1016/j.ijid.2008.06.037](https://doi.org/10.1016/j.ijid.2008.06.037) [Medline](#)
33. T. Nguyen *et al.*, Lack of H5N1 avian influenza transmission to hospital employees, Hanoi, 2004. (2005).
34. S. Velumani *et al.*, A novel peptide ELISA for universal detection of antibodies to human H5N1 influenza viruses. *PLoS ONE* **6**, e20737 (2011). [doi:10.1371/journal.pone.0020737](https://doi.org/10.1371/journal.pone.0020737) [Medline](#)
35. M. Prabakaran *et al.*, Development of epitope-blocking ELISA for universal detection of antibodies to human H5N1 influenza viruses. *PLoS ONE* **4**, e4566 (2009). [doi:10.1371/journal.pone.0004566](https://doi.org/10.1371/journal.pone.0004566) [Medline](#)
36. K. F. Shortridge, Pandemic influenza: a zoonosis? *Semin. Respir. Infect.* **7**, 11 (1992). [Medline](#)
37. J. R. Ortiz *et al.*, No evidence of avian influenza A (H5N1) among returning US travelers. *Emerg. Infect. Dis.* **13**, 294 (2007). [doi:10.3201/eid1302.061052](https://doi.org/10.3201/eid1302.061052) [Medline](#)
38. N. T. Liem, W. Lim, Lack of H5N1 avian influenza transmission to hospital employees, Hanoi, 2004. *Emerg. Infect. Dis.* **11**, 210 (2005). [Medline](#)
39. M. Wang *et al.*, Food markets with live birds as source of avian influenza. *Emerg. Infect. Dis.* **12**, 1773 (2006). [doi:10.3201/eid1211.060675](https://doi.org/10.3201/eid1211.060675) [Medline](#)
40. C. Schultz *et al.*, Avian influenza H5N1 and healthcare workers. *Emerg. Infect. Dis.* **11**, 1158 (2005). [Medline](#)
